# Supplementary material for: MIF inhibitor, ISO-1, attenuates human pancreatic cancer cell proliferation, migration and invasion in vitro, and suppresses xenograft tumour growth in vivo
Source: PubMed Central journal article supplement (PMC7174354; doi:10.1038/s41598-020-63778-y), 2020-04-21
Supplement: 41598_2020_63778_MOESM1_ESM.pdf [file 41598_2020_63778_MOESM1_ESM.pdf]

**MIF inhibitor, ISO-1, attenuates human pancreatic cancer cell proliferation, migration and invasion *in vitro*, and suppresses xenograft tumour growth *in vivo***

Bo Cheng <sup>a</sup>, Qiaofang Wang <sup>a</sup>, Yaodong Song <sup>a</sup>, Yanna Liu <sup>a</sup>, Yanyan Liu <sup>a</sup>, Shujun Yang <sup>a</sup>, Dejian Li <sup>a</sup>, Yan Zhang <sup>a</sup>, Changju Zhu <sup>a</sup>, \*

<sup>a</sup> Department of Emergency, the First Affiliated Hospital of Zhengzhou University, Henan 450052, China.

\* Corresponding authors: E-mail: zhuchangju98@163.com.

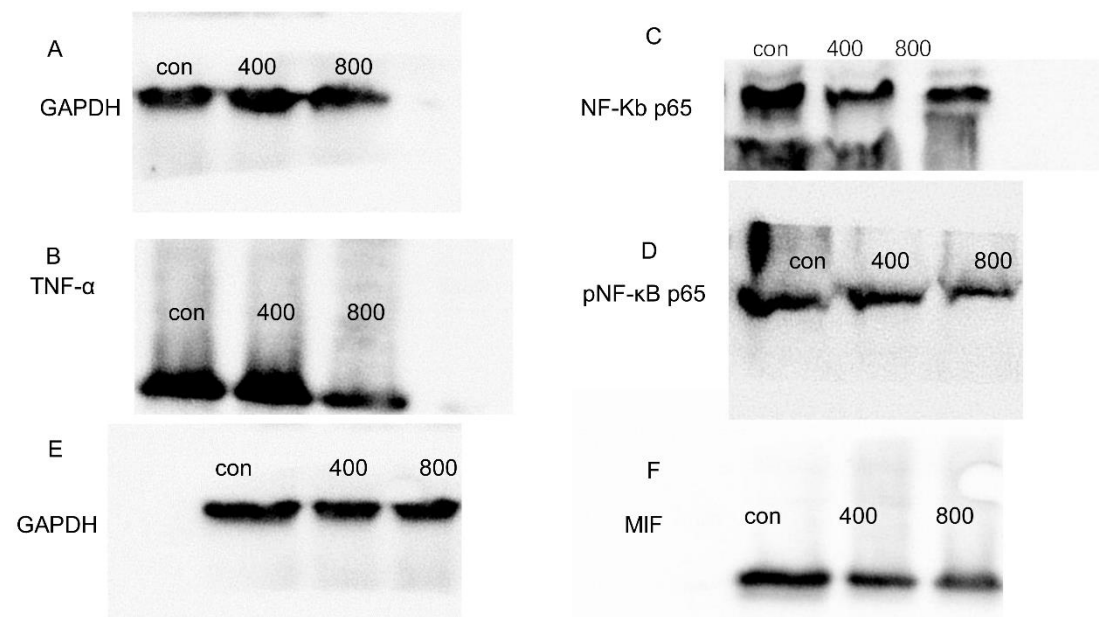

**Supplementary Figure1.** Full original western blot membranes for membrane strips presented in Figure 5 of the manuscript.
